# Supplementary material
Source: Springer Nature journal article supplement (https://www.springermedizin.de/resource/supplementary/13020_2012_161_MOESM2_ESM.pdf/9641106)
Supplement: MOESM2 [file 9641106]

A

| Name                                                                                                      | P value  | Network objects |
|-----------------------------------------------------------------------------------------------------------|----------|-----------------|
| Immune response_IL-1 signaling pathway                                                                    | 6.67E-07 | 7/44            |
| Apoptosis and survival_TNFR1 signaling pathway                                                            | 9.65E-06 | 6/43            |
| Mucin expression in CF via IL-6, IL-17 signaling pathways                                                 | 4.28E-05 | 5/34            |
| Development_Thrombopoetin signaling via JAK-STAT pathway                                                  | 1.11E-04 | 4/22            |
| Immune response_Antiviral actions of Interferons                                                          | 3.38E-04 | 5/52            |
| Immune response_IL-6 signaling pathway                                                                    | 3.39E-04 | 4/29            |
| Development_Role of HDAC and calcium/calmodulin-dependent kinase (CaMK) in control of skeletal myogenesis | 4.04E-04 | 5/54            |
| Immune response_TLR signaling pathways                                                                    | 4.79E-04 | 5/56            |
| Immune response_Oncostatin M signaling via MAPK in mouse cells                                            | 7.08E-04 | 4/35            |
| Immune response_Oncostatin M signaling via MAPK in human cells                                            | 8.77E-04 | 4/37            |
| Transcription_Role of AP-1 in regulation of cellular metabolism                                           | 9.72E-04 | 4/38            |
| Cytokine production by Th17 cells in CF                                                                   | 1.07E-03 | 4/39            |
| Immune response_Th1 and Th2 cell differentiation                                                          | 1.18E-03 | 4/40            |
| Reproduction_GnRH signaling                                                                               | 1.51E-03 | 5/72            |
| Immune response_MIF-mediated glucocorticoid regulation                                                    | 2.06E-03 | 3/22            |
| Immune response_Bacterial infections in normal airways                                                    | 2.53E-03 | 4/49            |
| Cytokine production by Th17 cells in CF (Mouse model)                                                     | 2.53E-03 | 4/49            |
| Immune response_Function of MEF2 in T lymphocytes                                                         | 2.72E-03 | 4/50            |
| Mucin expression in CF via TLRs, EGFR signaling pathways                                                  | 2.93E-03 | 4/51            |
| Apoptosis and survival_Endoplasmic reticulum stress response pathway                                      | 3.37E-03 | 4/53            |

B

| Gene group            | Gene name or symbol                                                                        |                                                                                      |                                                                                       |                                                                                                                                                                                                                                                |                                                                                                                                                                                                                                              |                                                                                                                                                                                                                   |
|-----------------------|--------------------------------------------------------------------------------------------|--------------------------------------------------------------------------------------|---------------------------------------------------------------------------------------|------------------------------------------------------------------------------------------------------------------------------------------------------------------------------------------------------------------------------------------------|----------------------------------------------------------------------------------------------------------------------------------------------------------------------------------------------------------------------------------------------|-------------------------------------------------------------------------------------------------------------------------------------------------------------------------------------------------------------------|
|                       | Down-regulation                                                                            |                                                                                      |                                                                                       | Up-regulation                                                                                                                                                                                                                                  |                                                                                                                                                                                                                                              |                                                                                                                                                                                                                   |
| Inflammatory response | HMOX1<br>MGLL<br>IRAK2<br>ORM1<br>ADORA2A<br>STAT5A<br>RIPK2<br>CXCL10<br>TNFAIP6<br>PTGS2 | OLR1<br>NFKB1<br>CCL4L1<br>IL6<br>IL18RAP<br>CCR7                                    |                                                                                       | CXCR4<br>TNFSF4<br>RXRA<br>PROK2<br>CYSLTR1<br>FOS<br>C3AR1<br>GHRL<br>ADORA3<br>PPARG                                                                                                                                                         | SERPINE1<br>ZFP36<br>TNF<br>MMP25<br>NFKBIZ<br>FPR2<br>OSM<br>GBA<br>NFATC3<br>CSF1R                                                                                                                                                         | IL10RB<br>DUSP10<br>ITGAL<br>LTA4H                                                                                                                                                                                |
| Immune response       | EBI3<br>AQP9<br>IRAK2<br>BCL2<br>NFKB2<br>CCL1<br>RIPK2<br>CD70<br>IL7R<br>CXCL10          | HERC5<br>CCL14<br>TANK<br>IFIH1<br>AIM2<br>NFKB1<br>GBP2<br>CCL4L1<br>P2RX7<br>EOMES | L18R1<br>TRIM25<br>CD86<br>OASL<br>HLA-DQA1<br>IL6<br>IL18RAP<br>CCR7<br>PVR<br>ISG15 | IL PSTPIP1<br>CD37<br>SIGIRR<br>PELI2<br>MALT1<br>LILRB2<br>CD4<br>SPN<br>CD1D<br>TNFSF4 FOS<br>KIR2DL4<br>SASH3<br>TMEM173<br>CORO1A<br>FYB<br>PPARG<br>NFIL3<br>UBE2L6<br>KIR3DL2<br>LILRA5<br>PYCARD<br>ITGAL<br>KIR2DS5<br>CTSC<br>IL18RAP | PTPN22<br>FCGR2B<br>C5AR1<br>GPR183<br>ICAM4<br>CD1A<br>KIR2DL3<br>TREM2<br>MAPKAPK3<br>SRPK2 FCGR1B<br>IL27RA<br>EXOSC9<br>INPP5D<br>IFITM2<br>BTK<br>CARD9<br>TNF<br>HLA-DMA<br>HLA-DMB<br>ITGA418R1<br>TRIM25<br>CD86<br>OASL<br>HLA-DQA1 | IL6<br>RNF125<br>S1PR4<br>FCGR1A<br>OSM<br>BMI1<br>FCAR<br>ST6GAL1<br>WAS<br>FUT7<br>KIR3DL1<br>CX3CR1<br>VEGFA<br>IFITM1<br>JUN<br>IL10RB<br>MR1<br>ICAM2<br>NOTCH1<br>KIR2DL1<br>DUSP10<br>CCR7<br>PVR<br>ISG15 |
